# Supplementary material
Source: PubMed Central journal article supplement (PMC6591590)
Supplement: AAC.00425-19-s0001.pdf [file AAC.00425-19-s0001.pdf]

## **Supplement**

Comparable Efficacy and Better Safety of Double  $\beta$ -Lactam Combination Therapy versus  $\beta$  Lactam Plus Aminoglycoside in Gram-negatives: A Meta-analysis of Randomized, Controlled Trials

**Table S1.** Definition of febrile neutropenia and other infections in the included trials.

| Study                    | Type of infection           | Definition                                                                                                                                                                                                                           |
|--------------------------|-----------------------------|--------------------------------------------------------------------------------------------------------------------------------------------------------------------------------------------------------------------------------------|
| <b>Middleman(1972)</b>   | Febrile neutropenia         | Neutropenia: neutrophils < 1000 /mm <sup>3</sup> ;<br>Fever: Body temperature >101F (equivalent to 38.3 °C), not associated with transfusion of blood products.                                                                      |
| <b>Klastersky (1975)</b> | Severe Infection            | Rectal temperature > 101F (equivalent to 38.3 °C);<br>Shaking chills; hypotension.                                                                                                                                                   |
| <b>Schimpff (1976)</b>   | Febrile neutropenia         | Neutropenia: absolute granulocyte count <1000/ $\mu$ L;<br>Fever: oral temperature $\geq$ 101F (equivalent to 38.3 °C); in absence of obvious noninfective cause of fever (e.g. blood products, cytotoxic drug).                     |
| <b>EORTC (1978)</b>      | Febrile neutropenia         | Neutropenia: granulocyte <1000 cells/ $\mu$ L;<br>Fever: temperature >101F (equivalent to 38.3 °C); in the absence of obvious noninfective causes of fever such as blood products or cytotoxic drugs.                                |
| <b>Bodey (1979)</b>      | Febrile neutropenia         | Neutropenia: granulocyte <1000 cells/ $\mu$ L;<br>Fever: temperature $\geq$ 101F (equivalent to 38.3 °C); fever not related to transfusion of blood products or to the administration of known pyrogens, such as immunotherapeutics. |
| <b>Wiston (1984)</b>     | Febrile neutropenia         | Neutropenia: granulocyte count <1000/mm <sup>3</sup> ;<br>Fever: temperature > 38 °C, not related to the administration of blood products or drugs.                                                                                  |
| <b>Fainstein (1984)</b>  | Febrile neutropenia         | Neutropenia: neutrophil count <1000/mm <sup>3</sup> ;<br>Fever: temperature $\geq$ 38.5 °C; presumed or proved to have infection.                                                                                                    |
| <b>Feld (1985)</b>       | Febrile neutropenia         | Neutropenic: neutrophil count <1000/mm <sup>3</sup> ;<br>Fever: temperature > 38 °C more than 3 times during a 12 hour period, or single temperature spike of at least 39 °C, or any level of fever with rigors.                     |
| <b>De Jongh (1986)</b>   | Febrile neutropenia         | Neutropenia: granulocyte count < 1000/mm <sup>3</sup> ;<br>Fever: temperature > 38 °C.                                                                                                                                               |
| <b>Rostein (1988)</b>    | Febrile neutropenia         | Neutropenia: neutrophils $\leq$ 1000/mm <sup>3</sup> ;<br>Fever: $\geq$ 38 °C at least twice during a 24-hour period, or at least 38.5 °C once.                                                                                      |
| <b>Torres (1989)</b>     | Severe Nosocomial Pneumonia | The nosocomial pneumonia were based on the appearance of new infiltrates in the chest X-ray at least 72 h following hospital admission, bronchial purulent secretions, leukocytosis and/or presence of fever.                        |
| <b>Kibbler (1989)</b>    | Febrile neutropenia         | Neutropenia: neutrophil count < 1.0 $\times$ 10 <sup>9</sup> /L.<br>Fever: temperature $\geq$ 38 °C for two consecutive hours or $\geq$ 39 °C on one occasion.                                                                       |
| <b>Joshi (1993)</b>      | Febrile neutropenia         | Neutropenia: absolute granulocyte count < 1000/ $\mu$ L;<br>Fever: temperature $\geq$ 38 °C.                                                                                                                                         |

**Table S2.** Definition of therapeutic response in the included trials.

| Study                    | Type of infection   | Therapeutic response                                                                                                                                                                                                                                                                                                                                                                                                                                                                                                                                                                                                                                                                                                                                        |
|--------------------------|---------------------|-------------------------------------------------------------------------------------------------------------------------------------------------------------------------------------------------------------------------------------------------------------------------------------------------------------------------------------------------------------------------------------------------------------------------------------------------------------------------------------------------------------------------------------------------------------------------------------------------------------------------------------------------------------------------------------------------------------------------------------------------------------|
| <b>Middleman (1972)</b>  | Febrile neutropenia | <i>Complete response:</i> afebrile and all clinical and laboratory signs of infection disappeared;<br><i>Relapse:</i> responded to antibiotic combination but had a recurrence within one week after cessation of therapy.                                                                                                                                                                                                                                                                                                                                                                                                                                                                                                                                  |
| <b>Klastersky (1975)</b> | Severe Infection    | <i>Success:</i> clinical signs of infection disappeared; patient survived or else died from causes unrelated to infection;<br><i>Failed:</i> patient died as a result of the initial infection or superinfection; or antibiotics had to be changed because of a lack of response or severe untoward reaction related to their use.                                                                                                                                                                                                                                                                                                                                                                                                                          |
| <b>Schimpff (1976)</b>   | Febrile neutropenia | <i>Improvement:</i> a return of temperature to normal or to the pre-infectious state with complete disappearance of all signs and symptoms of infection;<br><i>Temporary improvement:</i> return of temperature to normal and resolution of signs and symptoms of infection lasting at least 5 days but followed by a relapse of the same infection either while the patient was still receiving antibiotics or within 1 week after antibiotic discontinuation;<br><i>Failure:</i> no or poor response to antibiotic therapy; a change of antibiotics or the addition of granulocyte transfusions regardless of the patient's ultimate clinical course;<br><i>Non-evaluable:</i> improvement or no change without any specific relationship to antibiotics. |
| <b>EORTC (1978)</b>      | Febrile neutropenia | <i>Improvement:</i> a return of temperature to normal or to the pre-infectious state with complete disappearance of all signs and symptoms of infection;<br><i>Temporary improvement:</i> return of temperature to normal and resolution of signs and symptoms of infection lasting at least 5 days but followed by a relapse of the same infection either while the patient was still receiving antibiotics or within 1 week after antibiotic discontinuation;<br><i>Failure:</i> no or poor response to antibiotic therapy; a change of antibiotics or the addition of granulocyte transfusions regardless of the patient's ultimate clinical course;<br><i>Non-evaluable:</i> improvement or no change without any specific relationship to antibiotics. |
| <b>Bodey (1979)</b>      | Febrile neutropenia | <i>Cure:</i> disappearance of all clinical and laboratory evidence of infection at the time administration of the antibiotics was discontinued.                                                                                                                                                                                                                                                                                                                                                                                                                                                                                                                                                                                                             |
| <b>Wiston (1984)</b>     | Febrile neutropenia | <i>Improvement:</i> disappearance of fever with overall clinical improvement and eradication of the infecting organism;<br><i>Failure:</i> persistence of fever or the infecting organism without clinical improvement;<br><i>Non-evaluable:</i> infection considered unlikely, nonbacterial infection, or protocol violation.                                                                                                                                                                                                                                                                                                                                                                                                                              |
| <b>Fainstein (1984)</b>  | Febrile neutropenia | <i>Cure:</i> disappearance of all clinical and laboratory evidence of infection at the time of discontinuation of administration of the antibiotics.                                                                                                                                                                                                                                                                                                                                                                                                                                                                                                                                                                                                        |

|                        |                                   |                                                                                                                                                                                                                                                                                                                                                                                                                                                                                                                                                                                                                                                                                                                                                                                                                                                                |
|------------------------|-----------------------------------|----------------------------------------------------------------------------------------------------------------------------------------------------------------------------------------------------------------------------------------------------------------------------------------------------------------------------------------------------------------------------------------------------------------------------------------------------------------------------------------------------------------------------------------------------------------------------------------------------------------------------------------------------------------------------------------------------------------------------------------------------------------------------------------------------------------------------------------------------------------|
| <b>Feld (1985)</b>     | Febrile<br>neutropenia            | <p><i>Complete resolution:</i> disappearance of all signs and symptoms related to the infection, with the patient remaining afebrile for at least four days following the discontinuation of antibiotics;</p> <p><i>Temporary improvement:</i> a lessening of the signs and symptoms of infection with a decrease in peak temperature of at least 1.7 °C or a return to normal with signs at the site of infection showing improvement;</p> <p><i>Failure:</i> lack of improvement or death due to uncontrolled infection after four or more doses of therapy;</p> <p><i>Indeterminate response:</i> evaluation of antibiotic efficacy was not possible;</p> <p>For purpose of analysis, only two outcome categories: responses include complete response and 'favorable' temporary improvement; failure includes all other cases that could be evaluated.</p> |
| <b>De Jongh (1986)</b> | Febrile<br>neutropenia            | <p><i>Improvement:</i> complete resolution of all signs and symptoms of infection occurred without any antibiotic adjustment;</p> <p><i>Failure:</i> (1) changes in antimicrobial therapy were required or clinical deterioration (including those in which a pathogen resistant to one or both drugs was isolated), or development of adverse antibiotic-related reactions; (2) patients were receiving the empiric regimen at the time of death, and the infection had not completely resolved; (3) granulocyte transfusions were administered.</p>                                                                                                                                                                                                                                                                                                          |
| <b>Rostein (1988)</b>  | Febrile<br>neutropenia            | <p><i>Clinical response:</i> improvement only if resolution of all signs and symptoms of infection occurred;</p> <p><i>Response:</i> temporary improvement with relapse if, after improvement with therapy, fever and infection due to an organism present at the initiation of therapy recurred within 96 hours after discontinuing the antibiotic treatment;</p> <p><i>Failure:</i> (1) changes in antimicrobial therapy were required for clinical deterioration (including those in which a pathogen resistant to both drugs was isolated); or (2) there was no resolution of fever and/or the signs and symptoms of infection (when no occult fungal infection was believed to be present);</p> <p><i>Bacteriologic response:</i> eradication of the offending pathogen;</p> <p><i>Bacteriologic failure:</i> persistence of offending pathogen.</p>      |
| <b>Torres (1989)</b>   | Severe<br>Nosocomial<br>Pneumonia | <p><i>Clinical cure:</i> resolution of the clinical signs and symptoms;</p> <p><i>Favorable evolution:</i> improvement in clinical symptoms without a complete resolution;</p> <p><i>Therapeutic failure:</i> failure to eradicate the causative agent from the infection site;</p> <p><i>Microbiological cure:</i> complete eradication of the causative microorganism.</p>                                                                                                                                                                                                                                                                                                                                                                                                                                                                                   |
| <b>Kibbler (1989)</b>  | Febrile<br>neutropenia            | <p><i>Clinical response:</i> resolution of, or improvement in, clinical signs and symptoms before a change in therapy;</p> <p><i>Microbiological response:</i> eradication of the infecting pathogen during therapy and failure to isolate it following discontinuation of antibiotics.</p>                                                                                                                                                                                                                                                                                                                                                                                                                                                                                                                                                                    |
| <b>Joshi (1993)</b>    | Febrile<br>neutropenia            | <p><i>Response:</i> complete resolution of all signs and symptoms of infection and documentation that the infecting organism was eradicated;</p> <p><i>Failure:</i> complete resolution of infection was not apparent, or only partially apparent.</p>                                                                                                                                                                                                                                                                                                                                                                                                                                                                                                                                                                                                         |

**Table S3.** Renal toxicity for DBL and BLAG group as well as the exposures at studied doses.

| Trial           | DBL       | BLAG      | DBL |       |      | BLAG |       |                   | Aminoglycoside doses and predicted average drug exposures |                                |                          |                             |       |
|-----------------|-----------|-----------|-----|-------|------|------|-------|-------------------|-----------------------------------------------------------|--------------------------------|--------------------------|-----------------------------|-------|
|                 |           |           | No. | Total | %    | No.  | Total | %                 | Daily dose<br>mg/kg/day                                   | AUC <sub>0-24h</sub><br>mg·g/h | C <sub>max</sub><br>mg/L | C <sub>ss,avg</sub><br>mg/L | Ref.  |
| Middleman 1972  | CAR + CEF | CAR + KAN | 6   | 81    | 7.4  | 9    | 82    | 11.0              | 14.8                                                      | 187                            | 14 <sup>c</sup>          | 7.8                         | (1)   |
| Klastersky 1975 | TIC + CEF | CEF + TOB | 1   | 47    | 2.1  | 10   | 48    | 20.8              | 4.5                                                       | 71                             | 7.3                      | 3.0                         | (2-4) |
|                 |           | TIC + TOB |     |       |      | 3    | 53    | 5.7               |                                                           |                                |                          |                             |       |
| Schimpff 1976   | TIC + CEF | TIC + GEN | 2   | 62    | 3.2  | 0    | 65    | 0.0               | 4.4                                                       | 40                             | 4.3                      | 1.7                         | (2-4) |
| EORTC 1978      | TIC + CEF | TIC + GEN | 6   | 114   | 5.3  | 3    | 116   | 2.6               | 4.4                                                       | 40                             | 4.3                      | 1.7                         | (2-4) |
|                 |           | CAR + CEF | -   | -     | -    | -    | -     | -                 |                                                           |                                |                          |                             |       |
|                 |           | CEF + GEN |     |       |      | 22   | 135   | 16.3              |                                                           |                                |                          |                             |       |
| Bodey 1979      | CAR + FAM | CAR + TOB | 21  | 160   | 13   | 17   | 139   | 12                | 8.9                                                       | 141                            | 5.9                      | 5.9                         | (2-4) |
|                 | CAR + FAM |           | 20  | 170   | 12   |      |       |                   |                                                           |                                |                          |                             |       |
| Wiston 1984     | MOX + PIP | MOX + AMK | 2   | 136   | 1.5  | 6    | 136   | 4.4               | 15                                                        | 154                            | 19                       | 6.4                         | (5)   |
| Fainstein 1984  | MOX + TIC | MOX + TOB | -   | -     | -    | 6    | 228   | 2.6               | 8.9                                                       | 141                            | 5.9                      | 5.9                         | (2-4) |
| Feld 1985       | TIC + MOX | TIC + TOB | 2   | 88    | 2.3  | 2    | 85    | 2.4               | 5.0                                                       | 79                             | 6.1                      | 3.3                         | (2-4) |
| De Jongh 1986   | MOX + PIP | MOX + AMK | 2   | 145   | 1.4  | 12   | 130   | 9.2               | 14.3                                                      | 147                            | 36                       | 6.1                         | (5)   |
| Rostein 1988    | CFP + PIP | MEZ + TOB | 1   | 30    | 3.3  | 5    | 30    | 16.7              | low <sup>a</sup>                                          | low <sup>a</sup>               | low <sup>a</sup>         | low <sup>a</sup>            | (2)   |
| Torres 1989     | CTX + ATM | CTX + AMK | 0   | 6     | 0.0  | 3    | 6     | 50.0 <sup>b</sup> | 14.3                                                      | 147                            | 36                       | 6.1                         | (5)   |
| Kibbler 1989    | PIP + CAZ | PIP + NET | 3   | 37    | 8.1  | 7    | 35    | 20.0              | 7.0                                                       | 102                            | 18                       | 4.3                         | (6)   |
|                 | AZL + CAZ | AZL + NET | 2   | 36    | 5.6  | 9    | 42    | 21.4              |                                                           |                                |                          |                             |       |
| Joshi 1993      | CAZ + PIP | CAZ + TOB | 11  | 95    | 11.6 | 11   | 89    | 12.4              | 5.0                                                       | 79                             | 8.1                      | 3.3                         | (2-4) |

Abbreviations: EORTC = European Organization for Research on Treatment of Cancer; AZL = Azlocillin; ATM = Aztreonam; CAR = Carbenicillin; CFP = Cefoperazone; CTX = Cefotaxime; CEF = Cephalothin (Cefalotin); CAZ = Ceftazidime; FAM = Cefamandole; MEZ = Mezlocillin; MOX = Moxalactam; TIC = Ticarcillin; PIP = Piperacillin; AMK = Amikacin; GEN = Gentamicin; KAN = Kanamycin; NET = Netilmicin; TOB = Tobramycin. AUC<sub>0-24h</sub>: Area under the plasma concentration time curve from 0 to 24 h. C<sub>max</sub>: Peak concentration. C<sub>ss,avg</sub>: Average concentration at steady-state.

<sup>a</sup>: Tobramycin dosing was adjusted in this study based on peak concentrations, therefore the pharmacokinetic exposure was not calculated (7).

<sup>b</sup>: Renal toxicity was defined differently in this study (i.e. based on two renal biomarkers) compared to the definitions in other studies.

<sup>c</sup>: Peak concentration refers to intra-muscular dosing of kanamycin. Peaks after a short-term intravenous infusion would be slightly higher.

**Table S4.** Comparison of coagulopathy between studies with and without moxalactam (the table only shows studies which evaluated and reported coagulopathy).

| Trial                             | DBL       | BLAG      | DBL |       |      | BLAG    |                                |      |
|-----------------------------------|-----------|-----------|-----|-------|------|---------|--------------------------------|------|
|                                   |           |           | No. | Total | %    | No.     | Total                          | %    |
| <b>Studies without moxalactam</b> |           |           |     |       |      |         |                                |      |
| Klastersky 1975                   | TIC+CEF   | CEF + TOB | 2   | 51    | 3.9  | 0       | 49                             | 0    |
|                                   |           | TIC + TOB |     |       |      | 2       | 56                             | 3.6  |
| Schimpff 1976                     | TIC+CEF   | TIC + GEN | 1   | 62    | 1.6  | 0       | 65                             | 0    |
| Rostein 1988                      | CFP + PIP | MEZ + TOB | 4   | 30    | 13.3 | 1       | 30                             | 3.3  |
| Joshi 1993                        | CAZ + PIP | CAZ + TOB | 10  | 88    | 11.4 | 5       | 82                             | 6.1  |
| <i>Subtotal:</i>                  |           |           |     |       |      | AE 25;  | overall cases 513 <sup>a</sup> |      |
| <b>Studies with moxalactam</b>    |           |           |     |       |      |         |                                |      |
| Wiston 1984                       | MOX + PIP | MOX + AMK | 27  | 136   | 19.9 | 29      | 136                            | 21.6 |
| Fainstein 1984                    | MOX + TIC | MOX + TOB | 7   | 61    | 11.5 | 4       | 28                             | 14.3 |
| Feld 1985                         | TIC + MOX | TIC + TOB | 39  | 103   | 37.9 | 6       | 78                             | 7.7  |
| De Jongh 1986                     | MOX + PIP | MOX + AMK | 43  | 98    | 43.9 | 33      | 112                            | 59   |
| <i>Subtotal:</i>                  |           |           |     |       |      | AE 188; | overall cases 752              |      |

<sup>a</sup> Pooled renal toxicity between groups with (25%) and without (4.9%) moxalactam,  $p < 0.0001$  (Fisher's exact test).

**Figure S1.** Forest plots for microbiological response by pathogens of double β-lactam compared with β-lactam plus aminoglycoside. (A) *Pseudomonas aeruginosa*; (B) *Klebsiella* spp.; (C) *Escherichia coli*.

**(A) *Pseudomonas aeruginosa***

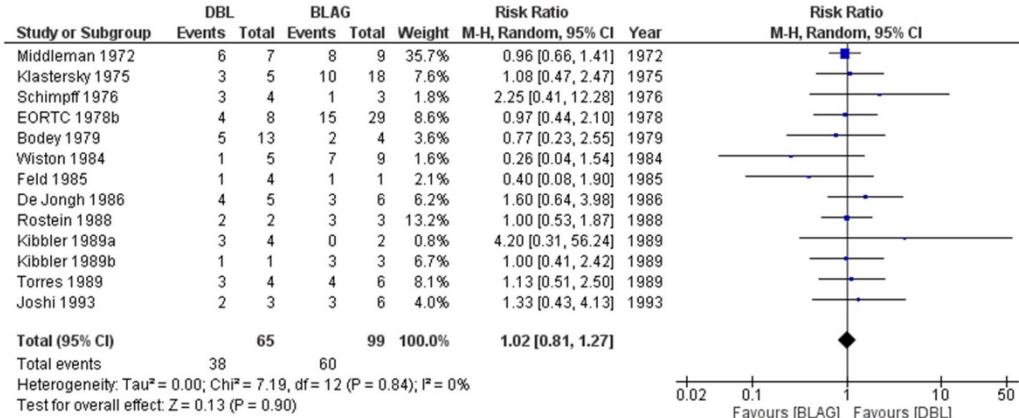

**(B) *Klebsiella* spp.**

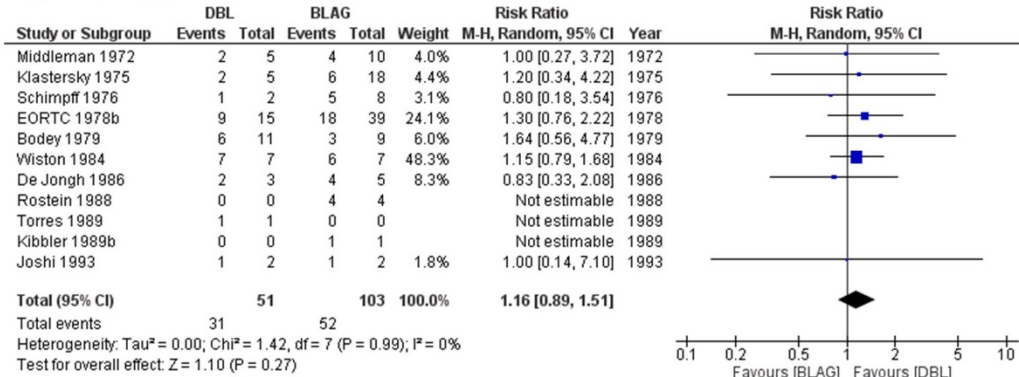

**(C) *Escherichia coli***

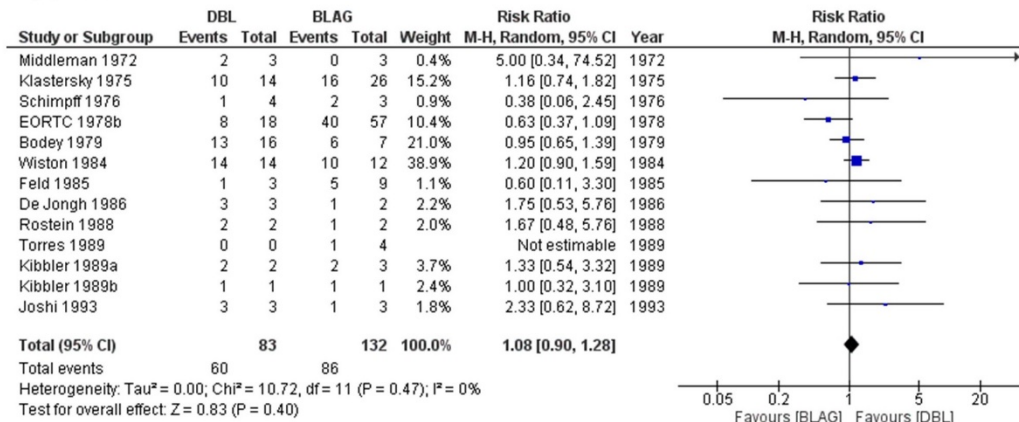

**Figure S2.** Sensitivity analysis for clinical response comparing double  $\beta$ -lactam combination with  $\beta$ -lactam plus aminoglycoside from eleven clinical trials in febrile neutropenia population: (A) Forest plot; (B) Funnel plot.

**(A) Forest plot**

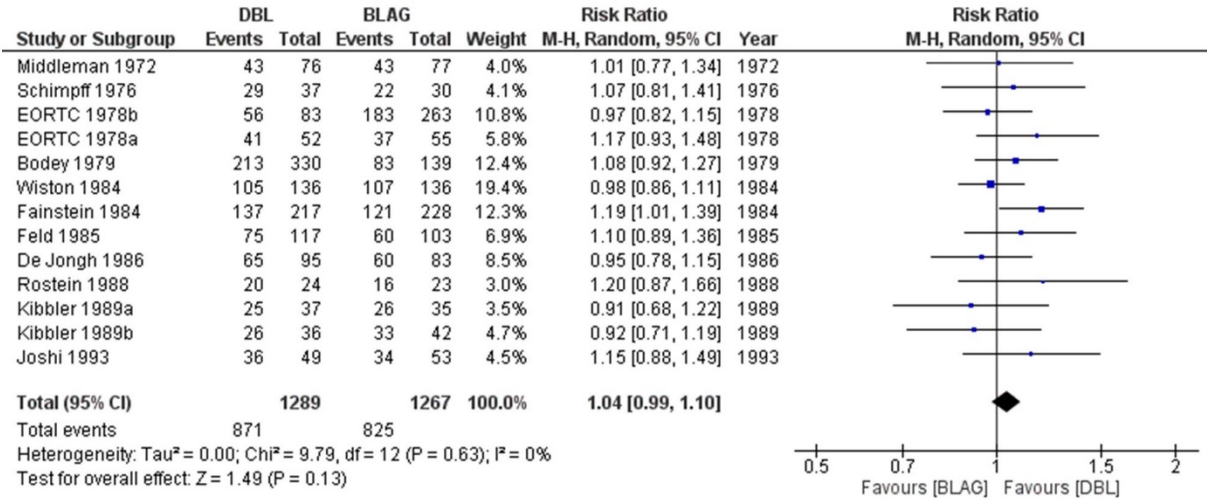

**(B) Funnel plot**

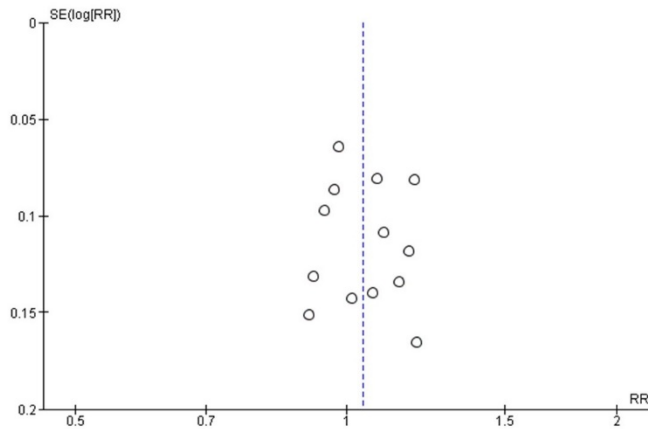



**Figure S3.** Sensitivity analysis for clinical response comparing double  $\beta$ -lactam combination with  $\beta$ -lactam plus aminoglycoside from eleven clinical trials in febrile neutropenia population: (A) Forest plot; (B) Funnel plot.

**(A) Forest plot**

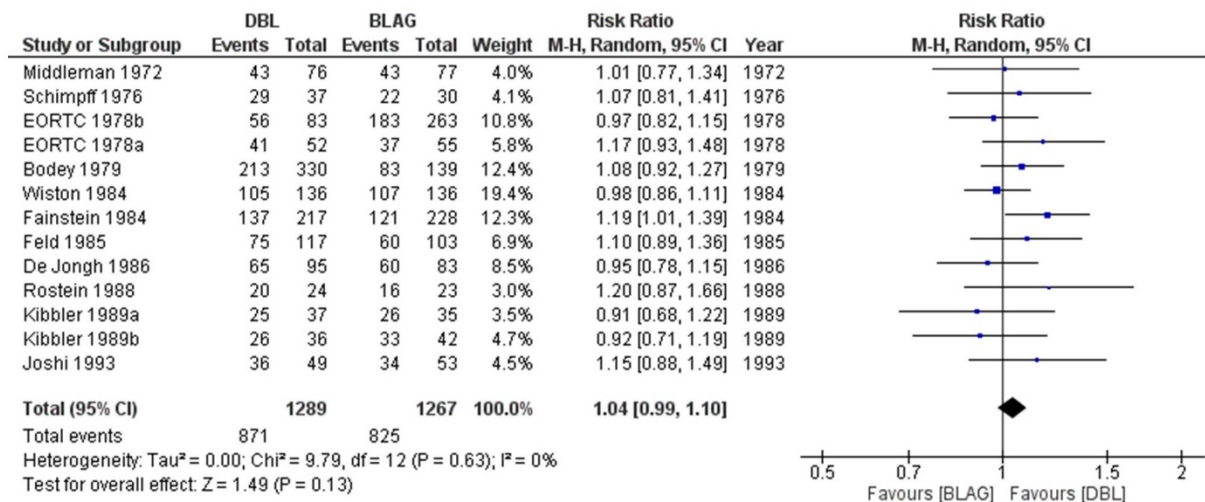

**(B) Funnel plot**

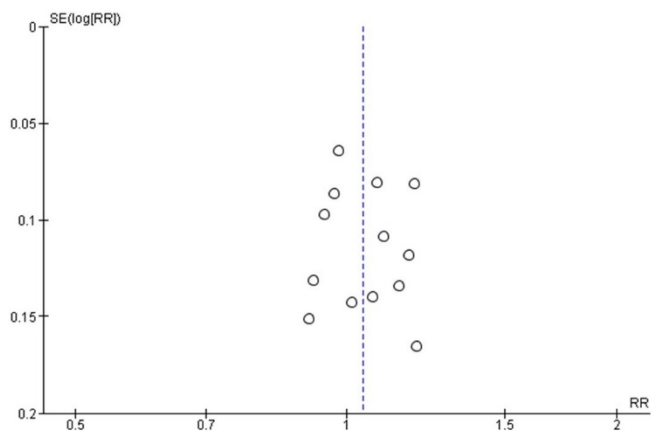

**Figure S4.** Clinical response between double  $\beta$ -lactam combination and  $\beta$ -lactam plus aminoglycoside from two clinical trials in non-febrile neutropenia population:

(A) Forest plot; (B) Funnel plot.

**(A) Forest plot**

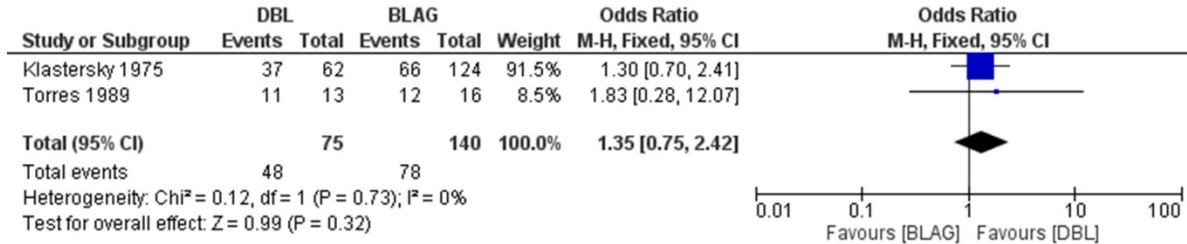

**(B) Funnel plot**

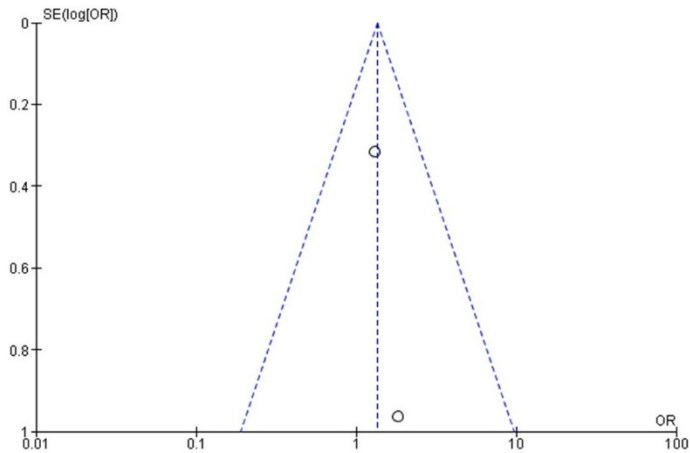

**Figure S5.** Forest plots for microbiological response in all bacteria (A) and microbiological response in Gram-negatives (B) for studies that included tobramycin. Please see Table S3 for the expected aminoglycoside drug exposures in these trials.

**(A) Microbiological responses**

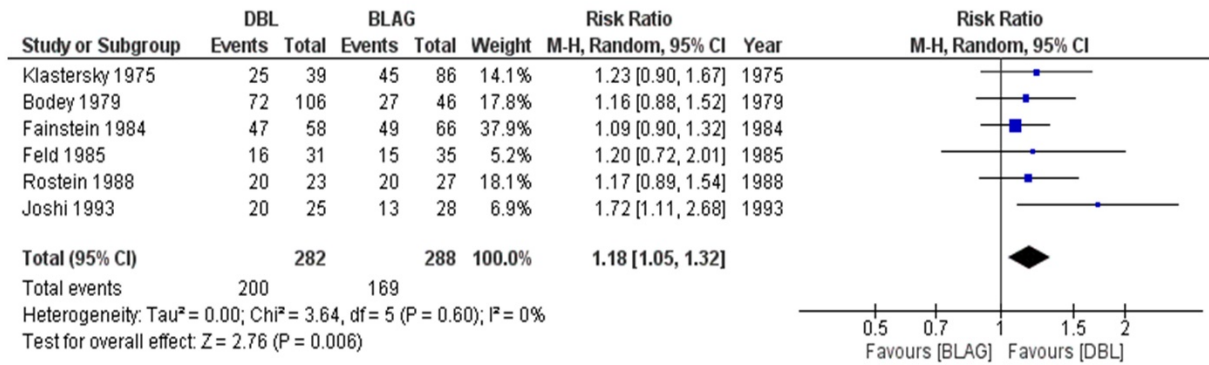

**(B) Microbiological responses in Gram-negatives**

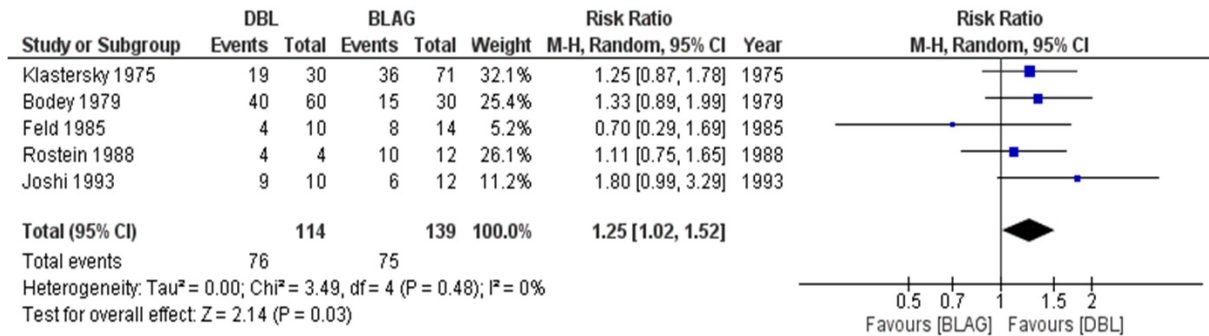

**Figure S6.** Forest plots for microbiological response in all bacteria (A) and microbiological response in Gram-negatives (B) for studies that included piperacillin in the DBL but not in the BLAG regimens.

**(A) Microbiological responses**

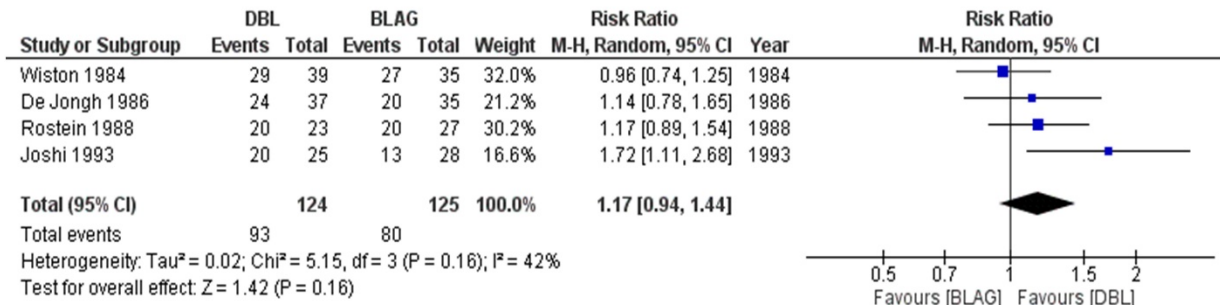

**(B) Microbiological responses in Gram-negatives**

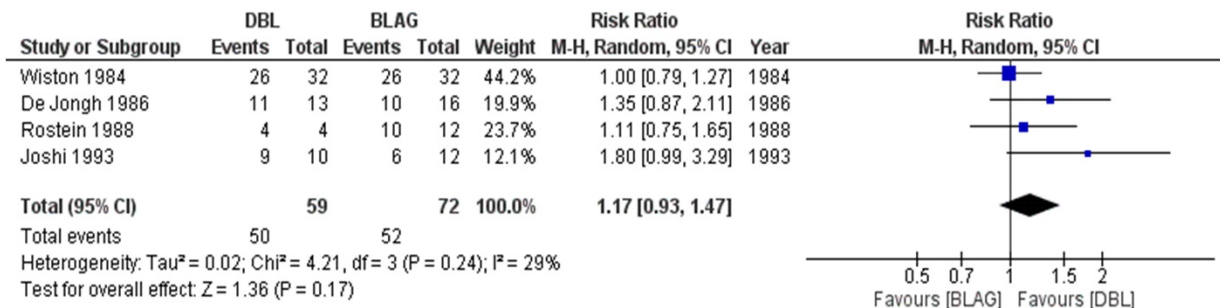

**References:**

1. Cabana BE, Taggart JG. 1973. Comparative pharmacokinetics of BB-K8 and kanamycin in dogs and humans. *Antimicrobial Agents and Chemotherapy* 3:478-483.
2. Lode H, Kemmerich B, Koeppe P. 1975. Comparative clinical pharmacology of gentamicin, sisomicin, and tobramycin. *Antimicrobial agents and chemotherapy* 8:396-401.
3. Conil JM, Georges B, Ruiz S, Rival T, Seguin T, Cougot P, Fourcade O, Pharmd GH, Saivin S. 2011. Tobramycin disposition in ICU patients receiving a once daily regimen: population approach and dosage simulations. *Br J Clin Pharmacol* 71:61-71. <https://doi.org/10.1111/j.1365-2125.2010.03793.x>.
4. Schentag JJ, Lasezkay G, Cumbo TJ, Plaut ME, Jusko WJ. 1978. Accumulation pharmacokinetics of tobramycin. *Antimicrob Agents Chemother* 13:649-656.
5. Der Auwera PV. 1991. Pharmacokinetic evaluation of single daily dose amikacin. *Journal of antimicrobial chemotherapy* 27:63-71.
6. Humbert G, Leroy A, Fillastre J, Oksenhendler G. 1978. Pharmacokinetics of netilmicin in the presence of normal or impaired renal function. *Antimicrobial agents and chemotherapy* 14:40-44.
7. Rotstein C, Cimino M, Winkey K, Cesari C, Fenner J. 1988. Cefoperazone plus piperacillin versus mezlocillin plus tobramycin as empiric therapy for febrile episodes in neutropenic patients. *The American journal of medicine* 85:36-43.
